# Supplementary material for: A novel Cu single-atom catalyst prepared through the adsorption characteristics of MoS2: from preparation to application
Source: Royal Society of Chemistry journal article supplement (doi:10.1039/d3ta06517k), 2023-12-06
Supplement: d3ta06517k1.pdf [file d3ta06517k1.pdf]

## A novel Cu single-atom catalyst prepared through the adsorption characteristics of MoS<sub>2</sub>: From preparation to application

Xu Zhang <sup>a, 1</sup>, Lang Ran <sup>a, 1</sup>, Yajuan Zheng <sup>a</sup>, Heng Zhang <sup>a</sup>, Lingxiao Zhu <sup>a</sup>, Lincheng Zhou <sup>a, \*</sup>, Hong Zhang <sup>b, \*</sup>

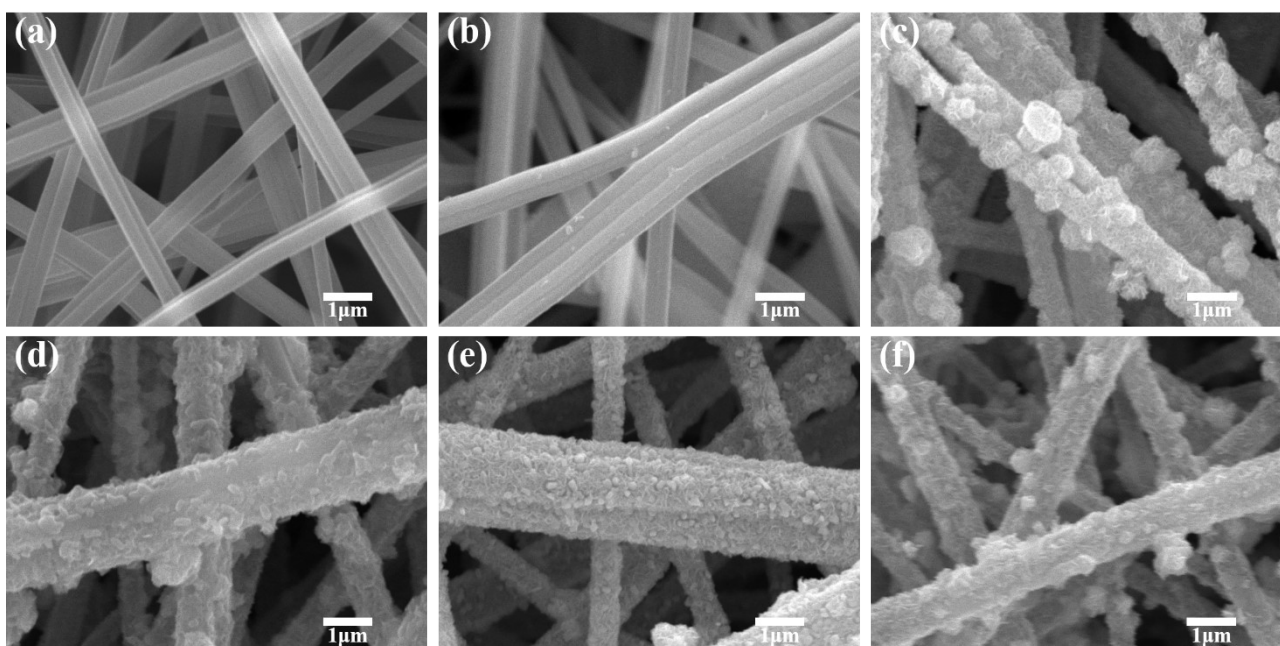

**Fig. S1** SEM images of (a) ECN , (b) PDA@ECN , (c) MoS<sub>2</sub>@ECN , (d) Cu@MoS<sub>2</sub>@ECN-400 , (e) Cu@MoS<sub>2</sub>@ECN-600 and (f) Cu@MoS<sub>2</sub>@ECN-800.

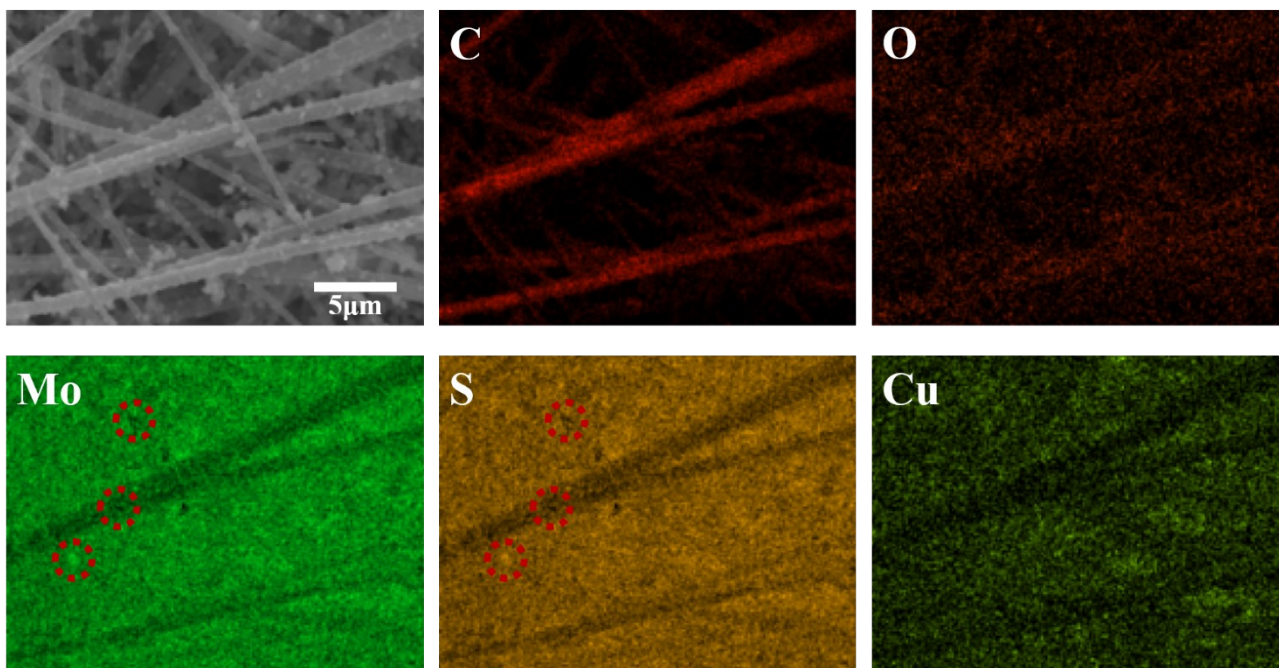

**Fig. S2** The element mapping image of the Cu@MoS<sub>2</sub>@ECN-600.

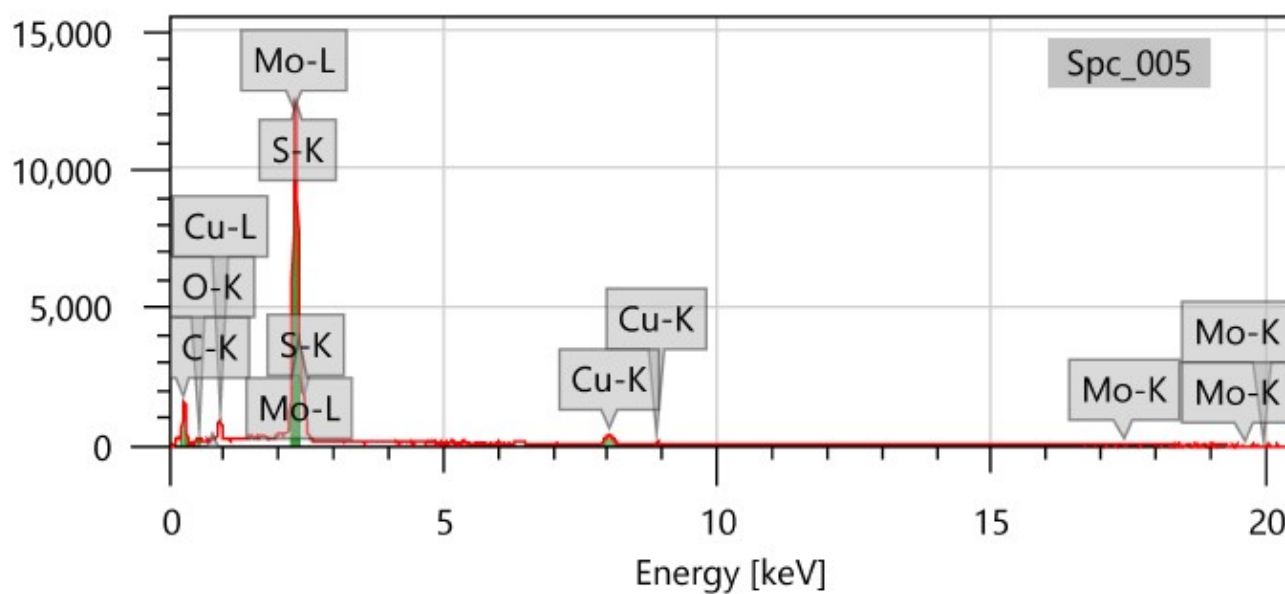

**Fig. S3** The EDS image of the Cu@MoS<sub>2</sub>@ECN-600.

**Table S1**The relative content of each element in the Cu@MoS<sub>2</sub>@ECN-600

| Element | Mass proportion (%) | Atom proportion (%) |
|---------|---------------------|---------------------|
| C       | 44.00±0.24          | 76.94±0.42          |
| O       | 2.26±0.09           | 2.96±0.12           |
| S       | 17.73±0.02          | 11.61±0.08          |
| Cu      | 5.45±0.10           | 1.80±0.03           |
| Mo      | 30.56±0.28          | 6.69±0.06           |
| Total   | 100                 | 100                 |

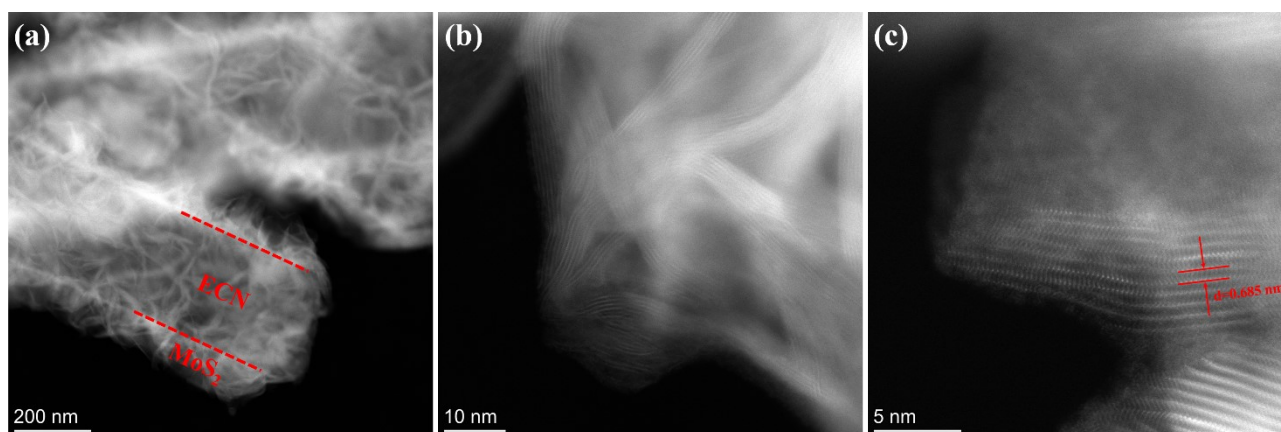**Fig. S4** The HAADF-STEM image of the Cu@MoS<sub>2</sub>@ECN-600.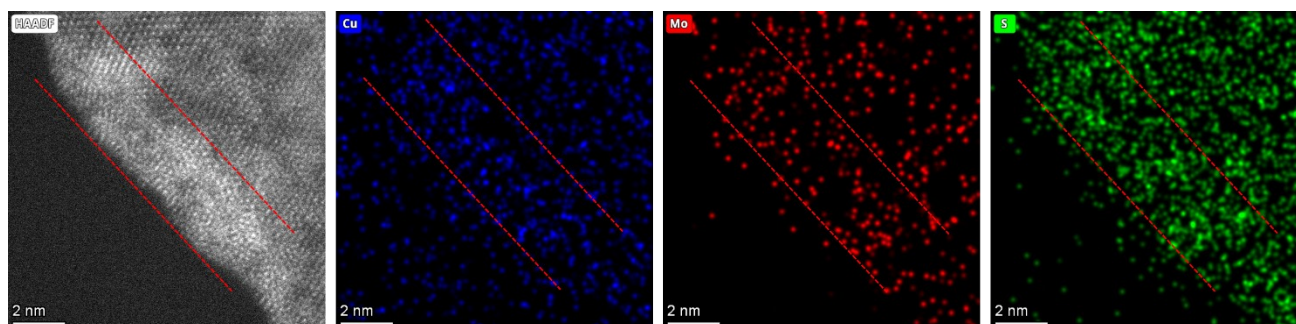**Fig. S5** Aberration corrected HAADF-STEM Mapping image of the Cu@MoS<sub>2</sub>@ECN-600.
